# Supplementary material
Source: PubMed Central journal article supplement (PMC5310605)
Supplement: rspb20162254supp1.pdf [file rspb20162254supp1.pdf]

## **Supplemental Online Material**

### **Historical Amphibian Declines in Brazil Linked to Chytridiomycosis**

Tamílie Carvalho<sup>1\*</sup>, C. Guilherme Becker<sup>2\*</sup>, Luís Felipe Toledo<sup>1,3\*</sup>

<sup>1</sup>Laboratório de História Natural de Anfíbios Brasileiros (LaHNAB), Departamento de Biologia Animal, Instituto de Biologia, Universidade Estadual de Campinas, Campinas, São Paulo, 13083-862, Brazil

<sup>2</sup>Departamento de Zoologia, Universidade Estadual Paulista, Rio Claro, São Paulo, 13506-900, Brazil

<sup>3</sup>Author for correspondence: Luís Felipe Toledo: toledolf2@yahoo.com

\*Authors contributed equally

## Supplemental Text

### **Material and Methods**

List of collections and museums from which samples were obtained.

- Coleção de Anuros Célio F. B. Haddad, Universidade Estadual Paulista, Rio Claro (CFBH)
- Coleção Científica de Anfíbios do Departamento de Zoologia e Botânica, Universidade Estadual Paulista, São José do Rio Preto (DZSJRP)
- Coleção de Anfíbios e Répteis, Instituto Nacional de Pesquisa da Amazônia, Manaus (INPA)
- Museu Nacional, Rio de Janeiro (MNRJ)
- Museu Paraense Emílio Goeldi, Belém (MPEG)
- Museu de Zoologia, Universidade de São Paulo, São Paulo (MZUSP)
- Museu de Ciência e Tecnologia, Pontifícia Universidade Católica do Rio Grande do Sul, Porto Alegre (MCP)
- Coleção Zoológica de Vertebrados, Universidade Federal de Mato Grosso, Cuiabá (CZV-UFMT)
- Coleção Científica do Laboratório de Herpetologia, Universidade Federal de Santa Maria, Santa Maria (ZUFMSM)
- Museu de Zoologia “Prof. Adão José Cardoso”, Universidade Estadual de Campinas, Campinas (ZUEC)

**Table S1.** Museum-preserved tadpoles analyzed visually and histologically for the presence of zoosporangia of *Batrachochytrium dendrobatidis*.

| <b>Specimen</b> | <b>Visual inspection</b> | <b>Histological Result</b>         |
|-----------------|--------------------------|------------------------------------|
| ZUEC 11546      | <i>Depigmented</i>       | <i>Bd Zoosporangia present</i>     |
| ZUEC 15827      | <i>Depigmented</i>       | <i>Bd Zoosporangia not found</i> * |
| ZUEC 15859      | <i>Depigmented</i>       | <i>Bd Zoosporangia present</i>     |
| ZUEC 17257      | <i>Depigmented</i>       | <i>Bd Zoosporangia present</i>     |
| ZUEC 17257      | <i>Depigmented</i>       | <i>Bd Zoosporangia present</i>     |
| ZUEC 19203      | <i>Depigmented</i>       | <i>Bd Zoosporangia present</i>     |
| ZUEC 19203      | <i>Depigmented</i>       | <i>Bd Zoosporangia present</i>     |
| ZUEC 15843      | <i>Depigmented</i>       | <i>Bd Zoosporangia present</i>     |
| ZUEC 15843      | <i>Depigmented</i>       | <i>Bd Zoosporangia present</i>     |
| ZUEC 20515      | <i>Depigmented</i>       | <i>Bd Zoosporangia present</i>     |
| ZUEC 1083       | <i>Pigmented</i>         | <i>Bd Zoosporangia not found</i>   |
| ZUEC 15201      | <i>Pigmented</i>         | <i>Bd Zoosporangia not found</i>   |
| ZUEC 15320      | <i>Pigmented</i>         | <i>Bd Zoosporangia not found</i>   |
| ZUEC 15402      | <i>Pigmented</i>         | <i>Bd Zoosporangia not found</i>   |
| ZUEC 15404      | <i>Pigmented</i>         | <i>Bd Zoosporangia not found</i>   |
| ZUEC 15417      | <i>Pigmented</i>         | <i>Bd Zoosporangia not found</i>   |
| ZUEC 15474      | <i>Pigmented</i>         | <i>Bd Zoosporangia not found</i>   |
| ZUEC 15642      | <i>Pigmented</i>         | <i>Bd Zoosporangia not found</i>   |
| ZUEC 15821      | <i>Pigmented</i>         | <i>Bd Zoosporangia not found</i>   |
| ZUEC 17811      | <i>Pigmented</i>         | <i>Bd Zoosporangia not found</i>   |

\* Tadpole with fully depigmented mouthpart.

**Table S2.** Proportion of *Bd*-positive or *Bd*-undetected tadpoles from three screening methods.

| <b>Pigmentation</b> | <b>Method</b>               | <b><i>Bd</i><sup>+</sup> n (%)</b> | <b><i>Bd</i> undetected n (%)</b> |
|---------------------|-----------------------------|------------------------------------|-----------------------------------|
| Normal              | Histological Sections       | 1 (10%)                            | 9 (90%)                           |
| Depigmented         | Histological Sections       | 10 (100%)                          | 0                                 |
| Normal              | qPCR test *                 | 2 (14.3%)                          | 12 (85.7%)                        |
| Depigmented         | qPCR test **                | 10 (100%)                          | 0                                 |
| Normal              | <i>Bd</i> isolation success | 6 (11%)                            | 48 (89%)                          |
| Depigmented         | <i>Bd</i> isolation success | 120 (100%)                         | 0                                 |

\**Bd* infection loads (zoospore genomic equivalents; g.e.) of samples 1-12=0, 13=2, 14=2.

\*\* *Bd* infection loads (g.e.) of samples 15=742, 16=570, 17=404, 18=388, 19=294, 20=566, 21=2604, 22=62, 23=1990, 24=1426.

**Table S3.** Species, site (number in parenthesis stands for the number of the site in Figure 2), probable period of population decline or extinction (some data refers to the last specimen collected and deposited in museums; though we did not have access to all collected specimens), suggested causes of threat, and references.

| <b>Family / Species</b>                         | <b>Site, State<br/>(Reference to Figures 2)</b> | <b>Date</b> | <b>Decline /<br/>Extinction</b> | <b>Suggested Cause</b>                            | <b>Reference</b>                                                                          |
|-------------------------------------------------|-------------------------------------------------|-------------|---------------------------------|---------------------------------------------------|-------------------------------------------------------------------------------------------|
| <b>Aromobatidae</b>                             |                                                 |             |                                 |                                                   |                                                                                           |
| <i>Allobates capixaba</i>                       | Santa Teresa, ES (10)                           | 1988        | Decline                         | Pollution, climatic changes and epidemic diseases | Weygoldt 1989                                                                             |
| <i>Allobates olfersioides</i>                   | Engenheiro Paulo de Frontin, RJ (8)             | 1987        | Extinct                         | Unknown                                           | Izecksohn & Carvalho e Silva 2001<br>DOU 2014; data based on the museum record MNRJ 40580 |
| <b>Bufonidae</b>                                |                                                 |             |                                 |                                                   |                                                                                           |
| <i>Melanophryniscus moreirae</i>                | Itatiaia, RJ (7)                                | 1975-1994   | Decline                         | Ultraviolet radiation and infectious diseases     | Guix <i>et al.</i> 1998                                                                   |
| <b>Brachycephalidae</b>                         |                                                 |             |                                 |                                                   |                                                                                           |
| <i>Ischnocnema oea</i>                          | Santa Teresa, ES (10)                           | 1942-1984   | Decline                         | Unknown                                           | JL Gasparini, person. comm.; Heye 1984                                                    |
| <i>Ischnocnema paranaensis</i>                  | Antonina, PR (3)                                | 1988-1999   | Extinct                         | Unknown                                           | Eterovick <i>et al.</i> 2005; Bornschein <i>e al.</i> 2015                                |
| <i>Ischnocnema parva</i>                        | Boraceia, SP (5)                                | 1979-1983   | Decline                         | Pollution and heavy frost                         | Heyer <i>et al.</i> 1988                                                                  |
| <i>Ischnocnema</i> sp. (aff. <i>guentheri</i> ) | Boraceia, SP (5)                                | 1979-1983   | Decline                         | Pollution and heavy frost                         | Heyer <i>et al.</i> 1988                                                                  |
| <b>Centrolenidae</b>                            |                                                 |             |                                 |                                                   |                                                                                           |
| <i>Vitreorana eurygnatha</i>                    | Santa Teresa, ES (10)                           | 1981-1987   | Extinct                         | Pollution, climatic changes and epidemic diseases | Weygoldt 1989                                                                             |
| <i>Vitreorana eurygnatha</i>                    | Boraceia, SP (5)                                | 1979-1982   | Decline                         | Pollution and heavy frost                         | Heyer <i>et al.</i> 1988                                                                  |
| <i>Vitreorana uranoscopa</i>                    | Rio de Janeiro, RJ (8)                          | 1951        | Decline                         | Unknown                                           | Izecksohn & Carvalho e Silva 2001<br>between 1951 (MNRJ) and 2011                         |

|                                       |                              |           |         |                                                   |                                                                                      |
|---------------------------------------|------------------------------|-----------|---------|---------------------------------------------------|--------------------------------------------------------------------------------------|
|                                       |                              |           |         |                                                   | (MNRJ) no individuals have been collected                                            |
| <b>Craugastoridae</b>                 |                              |           |         |                                                   |                                                                                      |
| <i>Holoaden bradei</i>                | Itamonte, MG (7)             | 1978      | Extinct | Habitat degradation and heavy frost               | Stuart <i>et al.</i> 2008; DOU 2014; data based on the museum record ZUEC 8138-45    |
| <b>Cycloramphidae</b>                 |                              |           |         |                                                   |                                                                                      |
| <i>Cycloramphus boraceiensis</i>      | Boraceia, SP (5)             | 1979-1982 | Extinct | Pollution and heavy frost                         | Heyer <i>et al.</i> 1988                                                             |
| <i>Cycloramphus duseni</i>            | Morretes, PR (3)             | 1982      | Extinct | Pollution and heavy frost                         | Eterovick <i>et al.</i> 2005                                                         |
| <i>Cycloramphus eleutherodactylus</i> | Rio de Janeiro, RJ (8)       | 1949      | Extinct | Unknown                                           | Izecksohn & Carvalho e Silva 2001<br>Last specimens collected in 1949: MNRJ 60503    |
| <i>Cycloramphus fuliginosus</i>       | Santa Teresa, ES (10)        | 1981-1987 | Extinct | Pollution, climatic changes and epidemic diseases | Weygoldt 1989                                                                        |
| <i>Cycloramphus fuliginosus</i>       | Rio de Janeiro, RJ (8)       | 1985      | Extinct | Unknown                                           | Izecksohn & Carvalho e Silva 2001<br>Last specimens collected in 1985: MNRJ 76112-13 |
| <i>Cycloramphus granulosis</i>        | Itatiaia, RJ (7)             | 1979-1982 | Extinct | Pollution and heavy frost                         | Heyer <i>et al.</i> 1988                                                             |
| <i>Cycloramphus mirandaribeiroi</i>   | São João da Graciosa, PR (3) | 1978-1986 | Extinct | Unknown                                           | Eterovick <i>et al.</i> 2005                                                         |
| <i>Cycloramphus ohausi</i>            | Serra dos Órgãos, RJ (8)     | 1942      | Extinct | Unknown                                           | DOU 2014; Last specimens collected in 1942: MNRJ 78796-97, MNRJ 78800-01             |
| <i>Cycloramphus semipalmatus</i>      | Boraceia, SP (5)             | 1979-1982 | Extinct | Pollution and heavy frost                         | Heyer <i>et al.</i> 1988                                                             |
| <i>Cycloramphus stejnegeri</i>        | Serra dos Órgãos, RJ (8)     | 1979      | Extinct | Unknown                                           | Garcia <i>et al.</i> 2010; DOU 2014; Last specimens collected in 1979: MNRJ 57052    |
| <i>Cycloramphus valae</i>             | Lauro Müller, SC (2)         | 1982      | Extinct | Unknown                                           | Heyer 1983                                                                           |
| <i>Cycloramphus valae</i>             | Cambará do Sul, RS (1)       | 1976      | Extinct | Unknown                                           | Garcia & Vinciprova 1998                                                             |

|                                   |                              |           |                    |                                                         |                                                                                   |
|-----------------------------------|------------------------------|-----------|--------------------|---------------------------------------------------------|-----------------------------------------------------------------------------------|
| <i>Thoropa taophora</i>           | Boraceia, SP (5)             | 1979-1982 | Extinct            | Pollution and heavy frost                               | Heyer <i>et al.</i> 1988                                                          |
| <i>Thoropa petropolitana</i>      | Serra dos Órgãos, RJ (8)     | 1982      | Extinct            | Pollution and heavy frost                               | Heyer <i>et al.</i> 1988; DOU 2014; MNRJ 61403-4                                  |
| <i>Thoropa lutzii</i>             | Serra dos Órgãos, RJ (8)     | 1951      | Extinct            | Unknown                                                 | Izecksohn & Carvalho e Silva 2001 MNRJ 23484-5                                    |
| <b>Dendrobatidae</b>              |                              |           |                    |                                                         |                                                                                   |
| <i>Ameerega flavopicta</i>        | Serra do Cipó, MG (9)        | 1974-1996 | Decline            | Fire, human settlement and habitat fragmentation        | Eterovick <i>et al.</i> 2005                                                      |
| <b>Eleutherodactylidae</b>        |                              |           |                    |                                                         |                                                                                   |
| <i>Adelophryne baturitensis</i> * | Pacoti, CE                   | 1993-1994 | Extinct            | Unknown                                                 | Eterovick <i>et al.</i> 2005                                                      |
| <b>Hemiphractidae</b>             |                              |           |                    |                                                         |                                                                                   |
| <i>Fritziana ohausi</i>           | Boraceia, SP (5)             | 1979-1982 | Decline or Extinct | Lack of breeding site, due to Bamboo reproductive cycle | Heyer <i>et al.</i> 1988                                                          |
| <b>Hylidae</b>                    |                              |           |                    |                                                         |                                                                                   |
| <i>Aplastodiscus flumineus</i>    | Serra dos Órgãos, RJ (8)     | 2003      | Decline            | Unknown                                                 | SP Carvalho e Silva, persn. comm.; UNIRIO 1589; 1736                              |
| <i>Aplastodiscus musicus</i>      | Serra dos Órgãos, RJ (8)     | 1986      | Extinct            | Unknown                                                 | SP Carvalho e Silva, persn. comm.                                                 |
| <i>Bokermannohyla circumdata</i>  | Rio de Janeiro, RJ (8)       | n/a       | Decline            | Unknown                                                 | Izecksohn & Carvalho e Silva 2001                                                 |
| <i>Bokermannohyla clepsydra</i>   | São José do Barreiro, SP (7) | 1968      | Extinct            | Unknown                                                 | Garcia <i>et al.</i> 2010; DOU 2014; Last specimens collected in 1968: ZUEC 15937 |
| <i>Bokermannohyla izecksohni</i>  | Botucatu, SP (4)             | 1993      | Extinct            | Habitat destruction, pollution                          | Machado <i>et al.</i> 2005; Last specimen collected in 1993: MNRJ 61401, 79116    |
| <i>Bokermannohyla langei</i>      | Morretes, PR (3)             | 1946-1986 | Extinct            | Unknown                                                 | Eterovick <i>et al.</i> 2005                                                      |
| <i>Dendropsophus ruschii</i>      | Santa Teresa, ES (10)        | 1982-1987 | Decline            | Pollution, climatic changes and epidemic diseases       | Weygoldt 1989                                                                     |
| <i>Hypsiboas cymbalum</i>         | Campo Grande da Serra,       | 1963***   | Extinct            | Habitat loss and                                        | Stuart <i>et al.</i> 2008; Garcia <i>et al.</i> 2010                              |

|                                                             |                                                       |                      |                                |                                                              |                                                                                               |
|-------------------------------------------------------------|-------------------------------------------------------|----------------------|--------------------------------|--------------------------------------------------------------|-----------------------------------------------------------------------------------------------|
| <i>Hypsiboas prasinus</i>                                   | SP (5)<br>Boraceia, SP (5)                            | 1965                 | Extinct                        | chytridiomycosis<br>Competition with <i>H. albopunctatus</i> | DOU 2014<br>Heyer <i>et al.</i> 1988                                                          |
| <i>Ololygon cf. perpusillus</i><br><i>Ololygon peixotoi</i> | Boraceia, SP (5)<br>Queimada Grande Island,<br>SP (5) | 1979-1982<br>2007*** | Decline<br>Decline/<br>Extinct | Pollution and heavy frost<br>Unknown                         | Heyer <i>et al.</i> 1988<br>DOU 2014                                                          |
| <i>Ololygon heyeri</i>                                      | Santa Teresa, ES (10)                                 | 1982-1987            | Decline                        | Pollution, climatic<br>changes and epidemic<br>diseases      | Weygoldt 1989                                                                                 |
| <i>Phyllodytes luteolus</i> **                              | Linhares, ES                                          | 1993-1995            | Extinct                        | Fire                                                         | Eterovick (1999); Papp & Papp<br>(2000)                                                       |
| <i>Xenohyla truncate</i>                                    | Itaguaí, RJ (8)                                       | 1967                 | Decline                        | Unknown                                                      | Stuart <i>et al.</i> 2008; DOU 2014; Last<br>specimens collected in 1967: MNR.<br>74019-20    |
| <b>Hylodidae</b>                                            |                                                       |                      |                                |                                                              |                                                                                               |
| <i>Crossodactylus dispar</i>                                | Boraceia, SP (5)                                      | 1979-1982            | Extinct                        | Pollution and heavy frost                                    | Heyer <i>et al.</i> 1988; Last specimens<br>collected in 1977: USNM 318225,<br>318227, 318230 |
| <i>Crossodactylus cf. gaudichaudii</i>                      | Boraceia, SP (5)                                      | 1979-1994            | Extinct                        | Progressive aridity of the<br>climate                        | Heyer <i>et al.</i> (1988), Bertoluci &<br>Heyer (1995)                                       |
| <i>Crossodactylus cf. gaudichaudii</i>                      | Santa Teresa, ES (10)                                 | 1982-1988            | Extinct                        | Pollution, climatic<br>changes and epidemic<br>diseases      | Weygoldt 1989                                                                                 |
| <i>Crossodactylus timbuhy</i>                               | Santa Teresa, ES (10)                                 | 1982-1988            | Decline                        | Pollution, climatic<br>changes and epidemic<br>diseases      | Weygoldt 1989                                                                                 |
| <i>Crossodactylus trachystomus</i>                          | Serra do Cipó, MG (9)                                 | 1974-1996            | Decline                        | Habitat reduction and<br>fragmentation                       | Eterovick <i>et al.</i> 2005                                                                  |
| <i>Crossodactylus wernerii</i>                              | Itatiaia, RJ (7)                                      | 1978                 | Extinct                        | Unknown                                                      | Pimenta <i>et al.</i> 2014                                                                    |
| <i>Hylodes asper</i>                                        | Boraceia, SP (5)                                      | 1979-1982            | Extinct                        | Pollution and heavy frost                                    | Heyer <i>et al.</i> 1988                                                                      |



|                                    |                                               |           |         |                                                   |                                                                   |
|------------------------------------|-----------------------------------------------|-----------|---------|---------------------------------------------------|-------------------------------------------------------------------|
| <i>Hylodes babax</i>               | Santa Teresa, ES (10)                         | 1982-1987 | Decline | Pollution, climatic changes and epidemic diseases | Weygoldt 1989                                                     |
| <i>Hylodes babax</i>               | Santa Teresa, ES (10)                         | 1988      | Extinct | Pollution, climatic changes and epidemic diseases | Weygoldt 1989                                                     |
| <i>Hylodes glaber</i>              | Brejo da Lapa, MG/RJ (7)                      | 1979-1984 | Extinct | Pollution and heavy frost                         | Heyer <i>et al.</i> 1988                                          |
| <i>Hylodes lateristrigatus</i>     | Santa Teresa, ES (10)                         | 1982-1988 | Extinct | Pollution, climatic changes and epidemic diseases | Weygoldt 1989                                                     |
| <i>Hylodes mertensi</i>            | Old road between São Paulo and Santos, SP (5) | 1956      | Extinct | Unknown                                           | Bokermann 1956                                                    |
| <i>Hylodes phyllodes</i>           | Boraceia, SP (5)                              | 1979-1982 | Decline | Pollution and heavy frost                         | Heyer <i>et al.</i> 1988                                          |
| <i>Megaelosia bocainensis</i>      | São José do Barreiro, SP (7)                  | 1968 ***  | Extinct | Unknown                                           | Giaretta <i>et al.</i> 1993; Holotype: MNRJ 15900.                |
| <b>Leptodactylidae</b>             |                                               |           |         |                                                   |                                                                   |
| <i>Adenomera marmorata</i>         | Boraceia, SP (5)                              | 1979-1983 | Decline | Pollution and heavy frost                         | Heyer <i>et al.</i> 1988                                          |
| <i>Paratelmatobius lutzii</i>      | Itatiaia, RJ (7)                              | 1978      | Extinct | Unknown                                           | Pombal & Haddad 1999; DOU 201                                     |
| <i>Paratelmatobius gaigeae</i>     | Paranapiacaba, SP (5) / Boraceia, SP (5)      | 1931      | Extinct | Habitat degradation                               | Pombal & Haddad 1999; Zaher <i>et al.</i> 2005                    |
| <i>Paratelmatobius mantiqueira</i> | Campos do Jordão, SP (6)                      | 1953      | Extinct | Unknown                                           | Pombal & Haddad 1999; Vrcibradić <i>et al.</i> 2010               |
| <i>Physalaemus jordanensis</i>     | Campos do Jordão, SP (6)                      | 2007      | Extinct | Unknown                                           | IA Martins, persn. comm.                                          |
| <b>Odontophrynidae</b>             |                                               |           |         |                                                   |                                                                   |
| <i>Proceratophrys moratoii</i>     | Botucatu, SP (4)                              | n/a       | Extinct | Habitat destruction, pollution                    | Machado <i>et al.</i> 2005                                        |
| <b>Phyllomedusidae</b>             |                                               |           |         |                                                   |                                                                   |
| <i>Phasmahyla guttata</i>          | Teresópolis, RJ (8)                           | 1979-1984 | Decline | Pollution and heavy frost                         | Heyer <i>et al.</i> 1988                                          |
| <i>Phasmahyla guttata</i>          | Rio de Janeiro, RJ (8)                        | 1969-2010 | Decline | Unknown                                           | Izecksohn & Carvalho e Silva 2001<br>Between 1969 (MNRJ 49235-36) |

|                                   |                          |           |         |                                                   |                                                                                              |
|-----------------------------------|--------------------------|-----------|---------|---------------------------------------------------|----------------------------------------------------------------------------------------------|
| <i>Phasmahyla exilis</i>          | Santa Teresa, ES (10)    | 1982-1987 | Decline | Pollution, climatic changes and epidemic diseases | and 2010 (MNRJ 78409-10) specimens were collected only in 1985 (MNRJ 81341-42) Weygoldt 1989 |
| <i>Phasmahyla exilis</i>          | Santa Teresa, ES (10)    | 1988      | Extinct | Pollution, climatic changes and epidemic diseases | Weygoldt 1989                                                                                |
| <i>Phrynomedusa appendiculata</i> | Paranapiacaba, SP (5)    | 1966      | Extinct | Unknown                                           | Garcia <i>et al.</i> 2004                                                                    |
| <i>Phrynomedusa bokermanni</i>    | Mongaguá, SP (5)         | 1978***   | Extinct | Unknown                                           | Present study                                                                                |
| <i>Phrynomedusa fimbriata</i>     | Paranapiacaba, SP (5)    | 1923***   | Extinct | Unknown                                           | Machado <i>et al.</i> 2005; Stuart <i>et al.</i> 2008; Garcia <i>et al.</i> 2010; DOU 2014   |
| <i>Phrynomedusa marginata</i>     | Santa Teresa, ES (10)    | 1974***   | Extinct | Unknown                                           | Present study                                                                                |
| <i>Phrynomedusa vanzolinii</i>    | Boraceia, SP (5)         | 1929***   | Extinct | Unknown                                           | Cruz 1991; Garcia <i>et al.</i> 2010; DOU 2014                                               |
| <i>Phrynomedusa vanzolinii</i>    | Serra dos Órgãos, RJ (8) | 1929***   | Extinct | Unknown                                           | Cruz 1991; Garcia <i>et al.</i> 2010; DOU 2014                                               |

Both species indicated with asterisks were not mapped, either because it does not occur in the Atlantic Forest “\*” or the causes of decline are well known and do not relate to *Bd* “\*\*\*”. UNIRIO: Universidade Federal do Rio de Janeiro; USNM: National Museum of Natural History; SP: state of São Paulo, RJ: state of Rio de Janeiro, MG: state of Minas Gerais, ES: state of Espírito Santo, PR: state of Paraná, SC: state of Santa Catarina, RS: state of Rio Grande do Sul. n/a = not available. Three asterisks “\*\*\*” indicates the year of description, and that no other individual was found after that.

**Table S4.** Spatiotemporal clusters of *Bd*-infected tadpoles obtained with 21-year temporal aggregations. Abbreviations as follows: temporal aggregation in years (AG), cluster radius in km (Radius), number of locations (NL), log-likelihood ratio (LLR), observed number of positive samples (O), expected positive cases (E), relative risk (RR).

| Cluster | AG | Latitude | Longitude | Radius | Period    | NL   | LLR   | <i>P</i> value | O    | E       | RR   |
|---------|----|----------|-----------|--------|-----------|------|-------|----------------|------|---------|------|
| Bd-C1   | 21 | 23.895 S | 46.425 W  | 368.69 | 1974-2015 | 6207 | 336.5 | < 0.001        | 1630 | 1028.09 | 2.52 |
| Bd-C2   | 21 | 29.242 S | 50.449 W  | -      | 1974-2015 | 772  | 167.9 | < 0.001        | 338  | 127.87  | 2.88 |
| Bd-C3   | 21 | 27.243 S | 53.953 W  | -      | 1995-2015 | 30   | 29.3  | < 0.001        | 24   | 4.97    | 4.86 |
| Bd-C4   | 21 | 26.564 S | 52.556 W  | 33.44  | 1995-2015 | 13   | 23.4  | < 0.001        | 13   | 2.15    | 6.06 |
| Bd-C5   | 21 | 27.737 S | 51.442 W  | 44.63  | 1995-2015 | 14   | 13.0  | < 0.001        | 11   | 2.32    | 4.76 |

**Table S5.** *Bd*-C1 obtained with 20-, 18-, 16-, 14-, 12-, and 10-year temporal aggregations. Abbreviations as follows: temporal aggregation in years (AG), cluster radius in km (Radius), number of locations (NL), log-likelihood ratio (LLR), observed number of positive samples (O), expected positive cases (E), relative risk (RR).

| AG | Latitude | Longitude | Radius | Period    | NL   | LLR   | <i>P</i> value | O    | E       | RR   |
|----|----------|-----------|--------|-----------|------|-------|----------------|------|---------|------|
| 10 | 23.895 S | 46.425 W  | 368.69 | 1976-2015 | 6047 | 366.2 | < 0.001        | 1628 | 1001.59 | 2.62 |
| 12 | 23.895 S | 46.425 W  | 368.69 | 1980-2015 | 5844 | 382.6 | < 0.001        | 1606 | 967.97  | 2.68 |
| 14 | 23.895 S | 46.425 W  | 368.69 | 1974-2015 | 6207 | 336.5 | < 0.001        | 1630 | 1028.09 | 2.52 |
| 16 | 23.895 S | 46.425 W  | 368.69 | 1984-2015 | 5776 | 387.6 | < 0.001        | 1598 | 956.70  | 2.69 |
| 18 | 23.895 S | 46.425 W  | 368.69 | 1980-2015 | 5844 | 382.6 | < 0.001        | 1606 | 967.97  | 2.68 |
| 20 | 23.895 S | 46.425 W  | 368.69 | 1976-2015 | 6047 | 366.2 | < 0.001        | 1628 | 1001.59 | 2.62 |

\* Centroid location and radius coincide among six alternative *Bd*-C1.

**Table S6.** AIC model averaging results for *Bd* occurrence (temporally detrended) in Brazilian tadpoles.

| <b>Data source</b>  | <b>Parameter</b>       | <b>Estimate</b> | <b>Std Error</b> |
|---------------------|------------------------|-----------------|------------------|
| Without error       | Intercept              | -0.415          | .                |
|                     | Human footprint        | 0.159           | 0.474            |
|                     | Vegetation density     | 0.065           | 0.474            |
|                     | Topographic complexity | 0.224           | 0.022            |
|                     | Rainfall               | 0.083           | 0.022            |
|                     | Temperature            | -0.125          | 0.030            |
|                     | Elevation              | 0.322           | 0.031            |
| 10% screening error | Intercept              | -0.411          | .                |
|                     | Human footprint        | 0.228           | 0.022            |
|                     | Vegetation density     | 0.047           | 0.022            |
|                     | Topographic complexity | 0.202           | 0.020            |
|                     | Rainfall               | 0.056           | 0.021            |
|                     | Temperature            | -0.120          | 0.029            |
|                     | Elevation              | 0.290           | 0.029            |

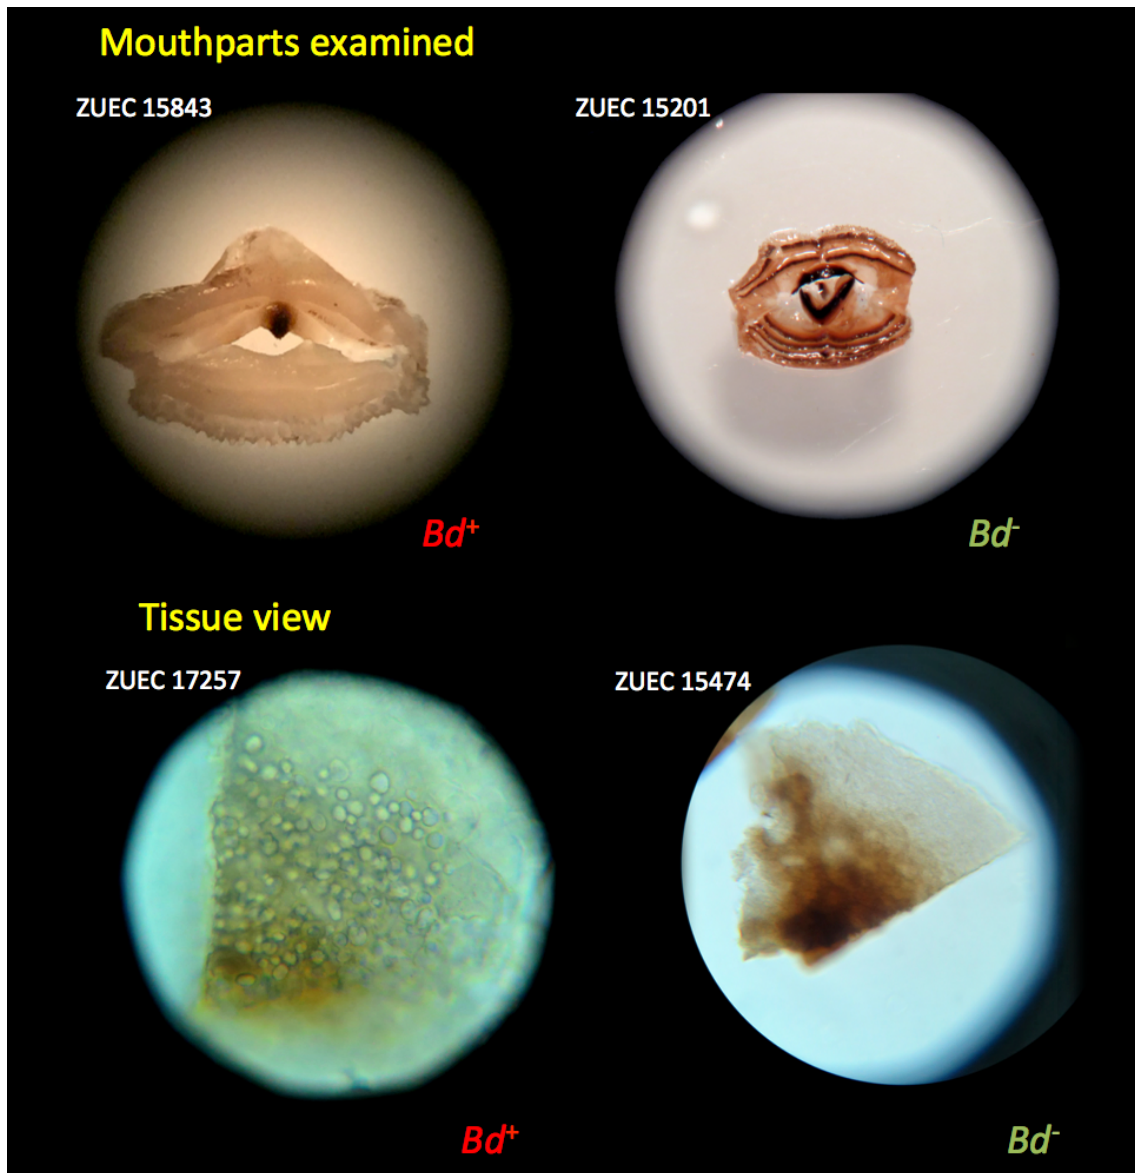

**Figure S1.** Mouthparts and tissue view of one *Bd*-infected and one uninfected tadpole analyzed histologically.

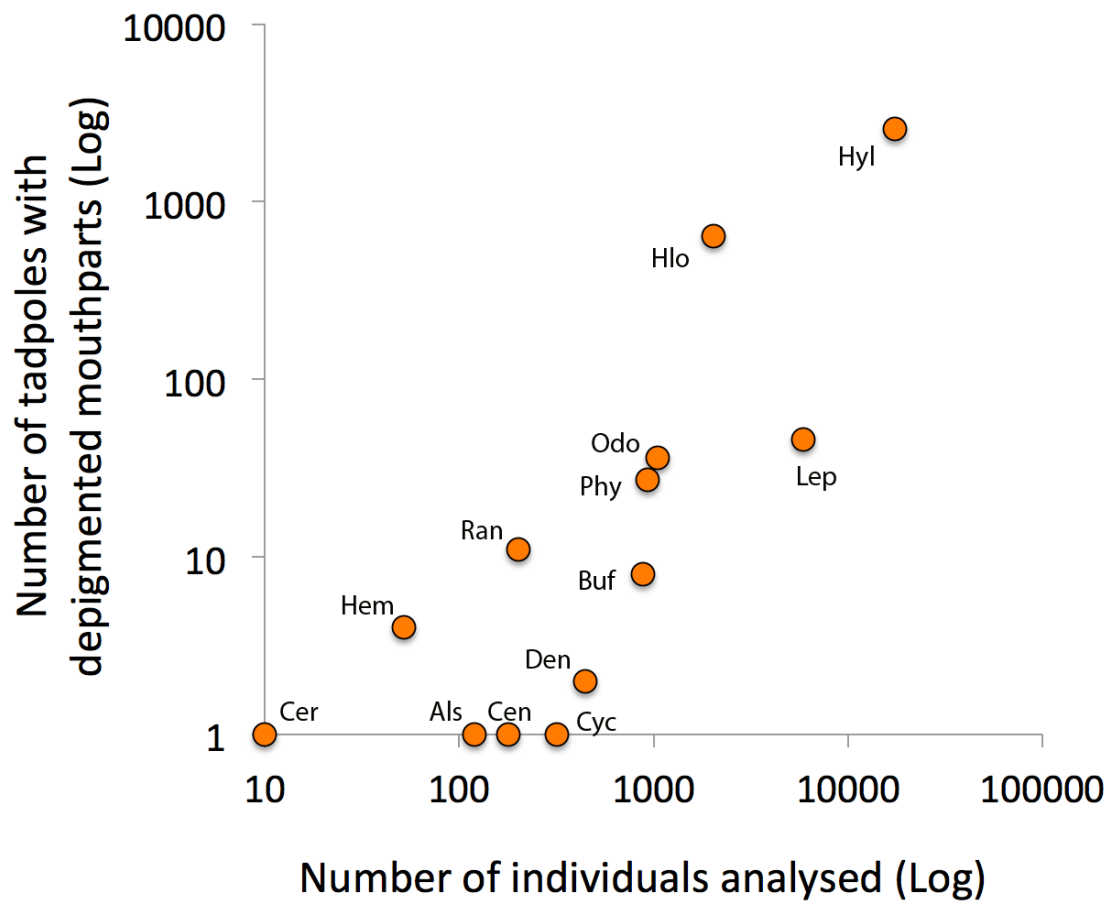

**Figure S2.** Correlation between number of tadpoles with depigmented mouthparts and number of specimens analyzed per family. The families are presented by the abbreviations: Als (Alsodidae), Buf (Bufonidae), Cen (Centrolenidae), Cer (Ceratophryidae), Cyc (Cycloramphidae), Den (Dendrobatidae), Hem (Hemiphractidae), Hyl (Hylidae), Hlo (Hylodidae), Lep (Leptodactylidae), Odo (Odontophrynidae), Phy (Phyllomedusidae), and Ran (Ranidae).

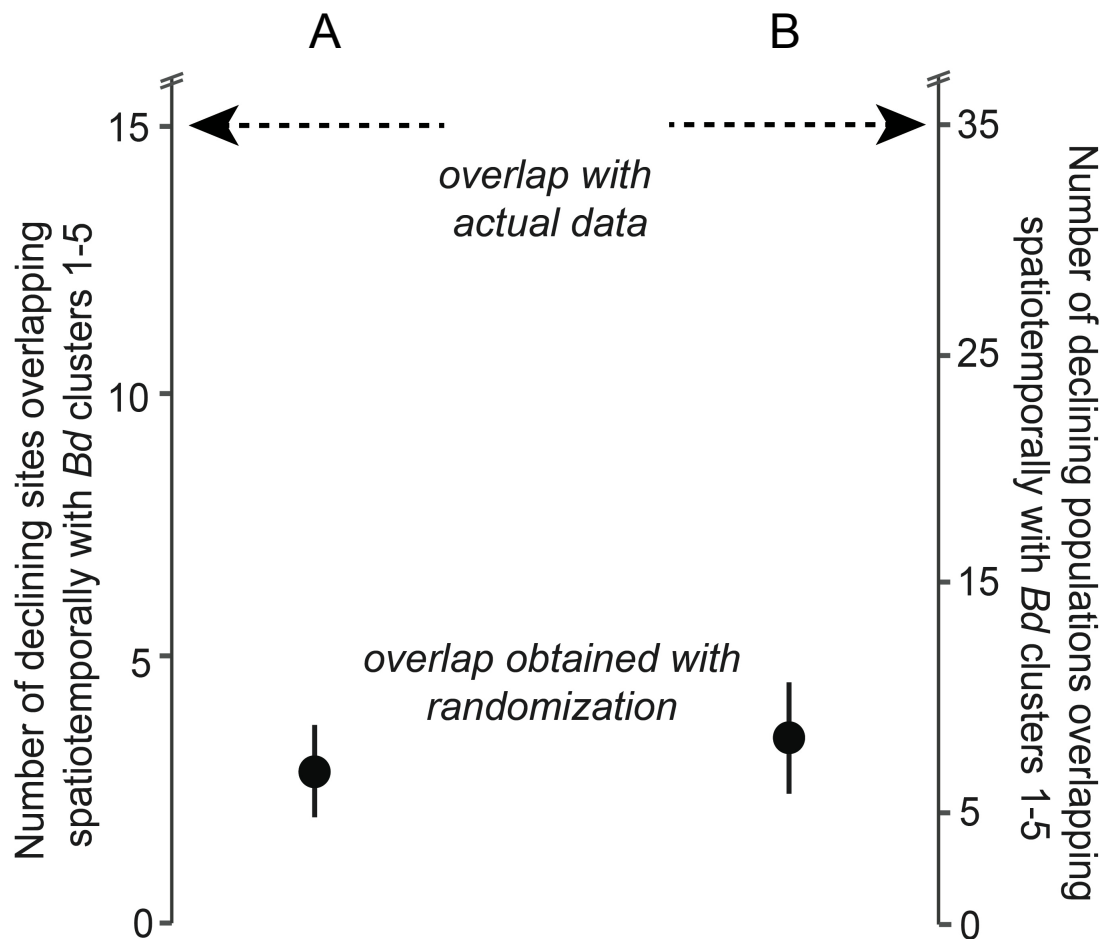

**Figure S3.** Number of declining sites (A) and amphibian populations (B) spatiotemporally overlapping with the actual data (*Bd* clusters 1-5; arrows). Number of declining sites and populations overlapping with randomly located *Bd* clusters 1-5 obtained with 100 randomizations of clusters' centroid locations; averages +/- 95% CI are shown.



## References

- Bertoluci J, Heyer WR. 1995 Boracéia update. *Froglog* **14**, 2–3.
- Bokermann, WCA. 1956 Una nueva especie del genero *Elosia* del sudeste del Brasil (Amphibia Salientia, Leptodactylidae). *Neotropica La Plata* **2**, 81–84.
- Bornschein MR, Mauricio GN, Pie MR. 2015 Rectification of the type locality of *Ischnocnema paranaensis* (Anura: Brachycephalidae), a missing species of the Atlantic Forest of Brazil. *Zootaxa* **3957**, 249–250.
- Cruz CAG. 1991 Descrição de duas espécies novas de Phyllomedusinae do sudeste Brasileiro (Amphibia, Anura, Hylidae). *Rev. Bras. Biol.* **51**, 271–275.
- Diário Oficial da União. 2014 Lista Nacional Oficial das Espécies da Fauna Ameaçadas de Extinção. Seção 1, ISSN 1677–7042, 121–130.
- Eterovick PC. 1999 Use and sharing of calling and retreat sites by *Phyllodytes luteolus* in a modified environment. *J. Herpetol.* **33**, 17–22.
- Eterovick PC, de Queiroz Carnaval ACO, Borges-Nojosa DM, Silvano DL, Segalla MV, Sazima I. 2005 Amphibian Declines in Brazil: An Overview1. *Biotropica* **37**, 166–179.
- Garcia PCA, Vinciprova G. 1998 Range extensions of some anuran species for Santa Catarina and Rio Grande do Sul States, Brazil. *Herpetol. Rev.* **29**, 117–117.
- Garcia PCA, Segalla MV, Silvano DL. 2004 *Phrynomedusa appendiculata*. The IUCN Red List of Threatened Species 2004: e.T55825A11374203.
- Garcia PCA *et al.* 2010 Anfíbios. In: Fauna ameaçada de extinção do estado de São Paulo. Eds Bressan PM, Kierulff MCM, Sugieda AM. Pp. 329–347. São Paulo: Fundação Parque Zoológico de São Paulo: Secretaria do Meio Ambiente.
- Giaretta AA, Bokermann WC, Haddad CF. 1993 A review of the genus *Megaelosia* (Anura: Leptodactylidae) with a description of a new species. *J. Herpetol.* **27**, 276–285.
- Guix JC, Montori A, Llorente GA, Carretero MA, Santos X. 1998 Natural history and conservation of bufonids in four Atlantic rainforests areas of southeastern Brazil. *Herpetol. Natl. Hist.* **6**, 1–12.
- Heyer WR. 1983 Variation and systematics of frogs of the genus *Cycloramphus* (Amphibia, Leptodactylidae). *Arq. Zool.* **30**, 235–339.
- Heyer WR. 1984 Variation, systematics, and zoogeography of *Eleutherodactylus guentheri* and closely related species (Amphibia: Anura: Leptodactylidae). *Smithsonian Institution Press.* **402**, 32–33.
- Heyer WR, Rand AS, da Cruz CAG, Peixoto OL. 1988 Decimations, extinctions, and colonizations of frog populations in southeast Brazil and their evolutionary implications. *Biotropica* **20**, 230–235.
- Izecksohn E, de Carvalho SP. 2001 *Anfíbios do município do Rio de Janeiro*. Ed. UFRJ.
- Machado ABM, Martins CS, Drummond GM. 2005 Lista da fauna brasileira ameaçada de extinção: incluindo a lista das espécies quase ameaçadas e deficientes em dados. Biodiversitas.
- Papp MG, Papp COG. 2000 Decline in a population of the treefrog *Phyllodytes luteolus* after fire. *Herpetol. Rev.* **31**, 93–94.

- Pimenta BVS, da Cruz CAG, Caramaschi U. 2014 Taxonomic review of the species complex of *Crossodactylus dispar* A. Lutz, 1925 (Anura, Hylodidae). *Arq. Zool.* **45**, 1–33.
- Pombal Jr JP, Haddad CF. 1999 Frogs of the genus *Paratelmatobius* (Anura: Leptodactylidae) with descriptions of two new species. *Copeia* 1014–1026.
- Stuart SN, Hoffmann M, Chanson J, Cox N, Berridge R, Ramani P, Young B. 2008 Threatened Amphibians of the World. Barcelona, Spain; International Union for the Conservation of Nature, Gland. Switzerland; Conservation International, Arlington, Virginia, USA.: Lynx Editions.
- Vrcibradic D, Ariani CV, Van Sluys M, Rocha CFD. 2010 Amphibia, Leptodactylidae, *Paratelmatobius mantiqueira* Pombal and Haddad, 1999: Distribution extension. *Check List* **6**, 001–002.
- Weygoldt P. 1989 Changes in the composition of mountain stream frog communities in the Atlantic mountains of Brazil: frogs as indicators of environmental deteriorations? *Stud. Neotrop. Fauna Environ.* **24**, 249–255.
- Zaher H, Aguiar E, Pombal Jr JP. 2005 *Paratelmatobius gaigeae* (Cochran, 1938) rediscovered (Amphibia, Anura, Leptodactylidae). *Arq. Mus. Nac. RJ* **63**, 321–328.
